# Supplementary material
Source: Research Square preprint supplement (doi:10.21203/rs.3.rs-9406753/v1)
Supplement: Supplementary file 1 [file 2df0262cf74fe781418b581d.pdf]

**Article title: Development of the Adapted Fennema-Sherman Mathematics Attitudes Scales: A Tool for Use with Students Aged 9-11**

**Journal name: Educational Studies in Mathematics**

**Author names: Stacy Marshall, Gosia Marschall, and Sara Hennessy**

**Affiliation: University of Cambridge**

**E-mail address of the corresponding author: [slm204@cam.ac.uk](mailto:slm204@cam.ac.uk)**

## Adapted Fennema-Sherman Mathematics Attitudes Scales

\*\*Key:

1= Strongly Disagree

2= Somewhat Disagree

3= Neither Agree Nor Disagree

4= Somewhat Agree

5= Strongly Agree

### Section 1

|    |                                                                               |   |   |   |   |   |
|----|-------------------------------------------------------------------------------|---|---|---|---|---|
| 1  | I talk to my teachers about a career which uses maths.                        | 1 | 2 | 3 | 4 | 5 |
| 2  | Other pupils will like me more if I get good marks in maths.                  | 1 | 2 | 3 | 4 | 5 |
| 3  | I don't like people to think I'm smart in maths.                              | 1 | 2 | 3 | 4 | 5 |
| 4  | Maths is enjoyable to me.                                                     | 1 | 2 | 3 | 4 | 5 |
| 5  | I like the challenge of maths problems I cannot understand right away.        | 1 | 2 | 3 | 4 | 5 |
| 6  | I am unsure I can do more challenging work in maths.                          | 1 | 2 | 3 | 4 | 5 |
| 7  | My teachers have not encouraged me to learn more maths.                       | 1 | 2 | 3 | 4 | 5 |
| 8  | Maths makes me feel uncomfortable, restless, irritable, and impatient.        | 1 | 2 | 3 | 4 | 5 |
| 9  | Maths is my worst subject.                                                    | 1 | 2 | 3 | 4 | 5 |
| 10 | I wouldn't mind having more maths lessons.                                    | 1 | 2 | 3 | 4 | 5 |
| 11 | I'd be proud to be an outstanding maths pupil.                                | 1 | 2 | 3 | 4 | 5 |
| 12 | Winning a prize in maths would make me feel embarrassed.                      | 1 | 2 | 3 | 4 | 5 |
| 13 | My teachers think I'm the kind of person who could do well in advanced maths. | 1 | 2 | 3 | 4 | 5 |
| 14 | My teachers make me feel I am good in maths.                                  | 1 | 2 | 3 | 4 | 5 |
| 15 | Maths games are boring.                                                       | 1 | 2 | 3 | 4 | 5 |
| 16 | I am sure that I can learn maths.                                             | 1 | 2 | 3 | 4 | 5 |
| 17 | It would be great to win an award in maths.                                   | 1 | 2 | 3 | 4 | 5 |
| 18 | I have a hard time getting teachers to talk seriously with me about maths.    | 1 | 2 | 3 | 4 | 5 |
| 19 | I am no good at maths.                                                        | 1 | 2 | 3 | 4 | 5 |
| 20 | For some reason, even though I study, maths is really hard for me.            | 1 | 2 | 3 | 4 | 5 |

### Section 2

|    |                                                                                                            |   |   |   |   |   |
|----|------------------------------------------------------------------------------------------------------------|---|---|---|---|---|
| 21 | My teachers would think I wasn't serious if I told them I was interested in a career in science and maths. | 1 | 2 | 3 | 4 | 5 |
| 22 | I do not think I could do advanced maths.                                                                  | 1 | 2 | 3 | 4 | 5 |
| 23 | I have a lot of self-confidence when it comes to maths.                                                    | 1 | 2 | 3 | 4 | 5 |
| 24 | If I get good marks in maths, I would try to hide them.                                                    | 1 | 2 | 3 | 4 | 5 |
| 25 | I like maths.                                                                                              | 1 | 2 | 3 | 4 | 5 |
| 26 | Being thought of as smart in maths would be a great thing.                                                 | 1 | 2 | 3 | 4 | 5 |
| 27 | I think I could handle more difficult maths.                                                               | 1 | 2 | 3 | 4 | 5 |

|    |                                                                                                    |   |   |   |   |   |
|----|----------------------------------------------------------------------------------------------------|---|---|---|---|---|
| 28 | If I got the highest marks in maths, I'd prefer no one knew.                                       | 1 | 2 | 3 | 4 | 5 |
| 29 | My teachers think advanced maths is a waste of time for me.                                        | 1 | 2 | 3 | 4 | 5 |
| 30 | I am happy to get good marks in maths.                                                             | 1 | 2 | 3 | 4 | 5 |
| 31 | My teachers have encouraged me to learn more maths.                                                | 1 | 2 | 3 | 4 | 5 |
| 32 | I can get good marks in maths.                                                                     | 1 | 2 | 3 | 4 | 5 |
| 33 | My teachers have been interested in my progress in maths.                                          | 1 | 2 | 3 | 4 | 5 |
| 34 | I am sure that I could do advanced work in maths.                                                  | 1 | 2 | 3 | 4 | 5 |
| 35 | I would rather have someone else figure out a tough maths problem than have to work it out myself. | 1 | 2 | 3 | 4 | 5 |
| 36 | I am usually calm during maths tests.                                                              | 1 | 2 | 3 | 4 | 5 |
| 37 | I have felt ignored when talking to teachers about maths.                                          | 1 | 2 | 3 | 4 | 5 |
| 38 | I feel confident trying maths.                                                                     | 1 | 2 | 3 | 4 | 5 |
| 39 | Getting a maths teacher to take me seriously has usually been a problem.                           | 1 | 2 | 3 | 4 | 5 |
| 40 | I dislike maths.                                                                                   | 1 | 2 | 3 | 4 | 5 |

### Section 3

|    |                                                                                                          |   |   |   |   |   |
|----|----------------------------------------------------------------------------------------------------------|---|---|---|---|---|
| 41 | When a maths problem comes up that I cannot solve right away, I stick with it until I find the solution. | 1 | 2 | 3 | 4 | 5 |
| 42 | I often worry about whether I've gotten maths problems correct.                                          | 1 | 2 | 3 | 4 | 5 |
| 43 | I get a sick feeling when I think of a maths test.                                                       | 1 | 2 | 3 | 4 | 5 |
| 44 | I like maths games.                                                                                      | 1 | 2 | 3 | 4 | 5 |
| 45 | Maths makes me feel uneasy, confused, and nervous.                                                       | 1 | 2 | 3 | 4 | 5 |
| 46 | Figuring out maths problems is not something I like to do.                                               | 1 | 2 | 3 | 4 | 5 |
| 47 | It would make other pupils like me less if I were a really good maths pupil.                             | 1 | 2 | 3 | 4 | 5 |
| 48 | I am usually unsure when trying maths.                                                                   | 1 | 2 | 3 | 4 | 5 |
| 49 | I do not understand how some people can spend so much time on maths and seem to like it.                 | 1 | 2 | 3 | 4 | 5 |
| 50 | I do not worry about getting maths problems correct.                                                     | 1 | 2 | 3 | 4 | 5 |
| 51 | My mind goes blank and I am unable to think clearly when working maths problems.                         | 1 | 2 | 3 | 4 | 5 |
| 52 | Maths does not scare me at all.                                                                          | 1 | 2 | 3 | 4 | 5 |
| 53 | Once I start working on a maths problem, it is hard to stop.                                             | 1 | 2 | 3 | 4 | 5 |
| 54 | I almost never get nervous during a maths test.                                                          | 1 | 2 | 3 | 4 | 5 |
| 55 | The challenge of maths problems does not interest me.                                                    | 1 | 2 | 3 | 4 | 5 |
| 56 | My teachers have made me feel I am not good in maths.                                                    | 1 | 2 | 3 | 4 | 5 |
| 57 | I am usually calm in maths lessons.                                                                      | 1 | 2 | 3 | 4 | 5 |
| 58 | A maths test would scare me.                                                                             | 1 | 2 | 3 | 4 | 5 |
| 59 | I don't usually worry about being able to solve maths problems.                                          | 1 | 2 | 3 | 4 | 5 |
| 60 | Being first in a maths competition would make me happy.                                                  | 1 | 2 | 3 | 4 | 5 |
