# Supplementary material
Source: Research Square preprint supplement (doi:10.21203/rs.3.rs-9406753/v1)
Supplement: Supplementary file 2 [file 4a386767411f1f128e748c8b.pdf]

**Article title: Development of the Adapted Fennema-Sherman Mathematics Attitudes Scales: A Tool for Use with Students Aged 9-11**

**Journal name: Educational Studies in Mathematics**

**Author names: Stacy Marshall, Gosia Marschall, and Sara Hennessy**

**Affiliation: University of Cambridge**

**E-mail address of the corresponding author: [slm204@cam.ac.uk](mailto:slm204@cam.ac.uk)**

## Sub-survey scoring of the AFSMAS

| <b>Sub-Survey</b>               | <b>Item Numbers</b>                           |
|---------------------------------|-----------------------------------------------|
| <b>Attitude Towards Success</b> | 3, 4, 10, 11, 12, 15, 17, 24, 25, 26, 40, 44  |
| <b>Anxiety</b>                  | 8, 36, 42, 43, 45, 50, 51, 52, 54, 57, 58, 59 |
| <b>Confidence</b>               | 6, 9, 16, 19, 20, 22, 23, 27, 32, 34, 38, 48  |
| <b>Effectance Motivation</b>    | 2, 5, 28, 30, 35, 41, 46, 47, 49, 53, 55, 60  |
| <b>Teacher</b>                  | 1, 7, 13, 14, 18, 21, 29, 31, 33, 37, 39, 56  |
